# Supplementary material for: Cellular and Humoral Responses to Recombinant and Inactivated SARS-CoV-2 Vaccines in CKD Patients: An Observational Study
Source: MDPI journal article supplement (doi:10.3390/jcm12031225), 2023-02-03
Supplement: s1 [file s1]

| Questionnaire on Adverse Reactions to COVID-19 vaccination |                                                            |                |                        |                |                       |                |
|------------------------------------------------------------|------------------------------------------------------------|----------------|------------------------|----------------|-----------------------|----------------|
| Name                                                       | Gender                                                     | Age            | contact information    |                |                       |                |
| Type of COVID-19 vaccine                                   |                                                            |                | Group                  |                |                       |                |
| adverse reaction                                           | Level of adverse reactions (1-4 for each adverse reaction) |                |                        |                |                       |                |
|                                                            | The first vaccination                                      |                | The second vaccination |                | The third vaccination |                |
|                                                            | Within 7 days                                              | Within 30 days | Within 7 days          | Within 30 days | Within 7 days         | Within 30 days |
| Local pain (affecting limb movement)                       |                                                            |                |                        |                |                       |                |
| Local swelling (diameter)                                  |                                                            |                |                        |                |                       |                |
| Local induration (diameter)                                |                                                            |                |                        |                |                       |                |
| Local redness (diameter)                                   |                                                            |                |                        |                |                       |                |
| Local rash (diameter)                                      |                                                            |                |                        |                |                       |                |
| Local itching (48h)                                        |                                                            |                |                        |                |                       |                |
| Phlegmon                                                   |                                                            |                |                        |                |                       |                |
| Fever (37.3, 38, 38.5)                                     |                                                            |                |                        |                |                       |                |
| Cough (treatment or not)                                   |                                                            |                |                        |                |                       |                |
| Difficulty breathing (when)                                |                                                            |                |                        |                |                       |                |
| Anorexia                                                   |                                                            |                |                        |                |                       |                |
| Nausea (duration)                                          |                                                            |                |                        |                |                       |                |
| Vomiting (number of times)                                 |                                                            |                |                        |                |                       |                |
| Constipation (treatment or not)                            |                                                            |                |                        |                |                       |                |
| Diarrhea (frequency/day, fecal character)                  |                                                            |                |                        |                |                       |                |
| Myalgia (non-vaccination site, activity)                   |                                                            |                |                        |                |                       |                |
| Arthralgia (Daily activities)                              |                                                            |                |                        |                |                       |                |
| Arthritis (pain level, activity)                           |                                                            |                |                        |                |                       |                |
| Headache (affecting activity)                              |                                                            |                |                        |                |                       |                |
| Syncope(loss of consciousness or not)                      |                                                            |                |                        |                |                       |                |
| Insomnia (Affecting life)                                  |                                                            |                |                        |                |                       |                |
| Fatigue (affects activity)                                 |                                                            |                |                        |                |                       |                |
| Mental disorders (anxiety, depression, etc.)               |                                                            |                |                        |                |                       |                |
| Acute allergic reaction (urticaria, treatment or not)      |                                                            |                |                        |                |                       |                |
| Others                                                     |                                                            |                |                        |                |                       |                |
