# Supplementary material for: Cellular and Humoral Responses to Recombinant and Inactivated SARS-CoV-2 Vaccines in CKD Patients: An Observational Study
Source: MDPI journal article supplement (doi:10.3390/jcm12031225), 2023-02-03
Supplement: s1 [file s1]

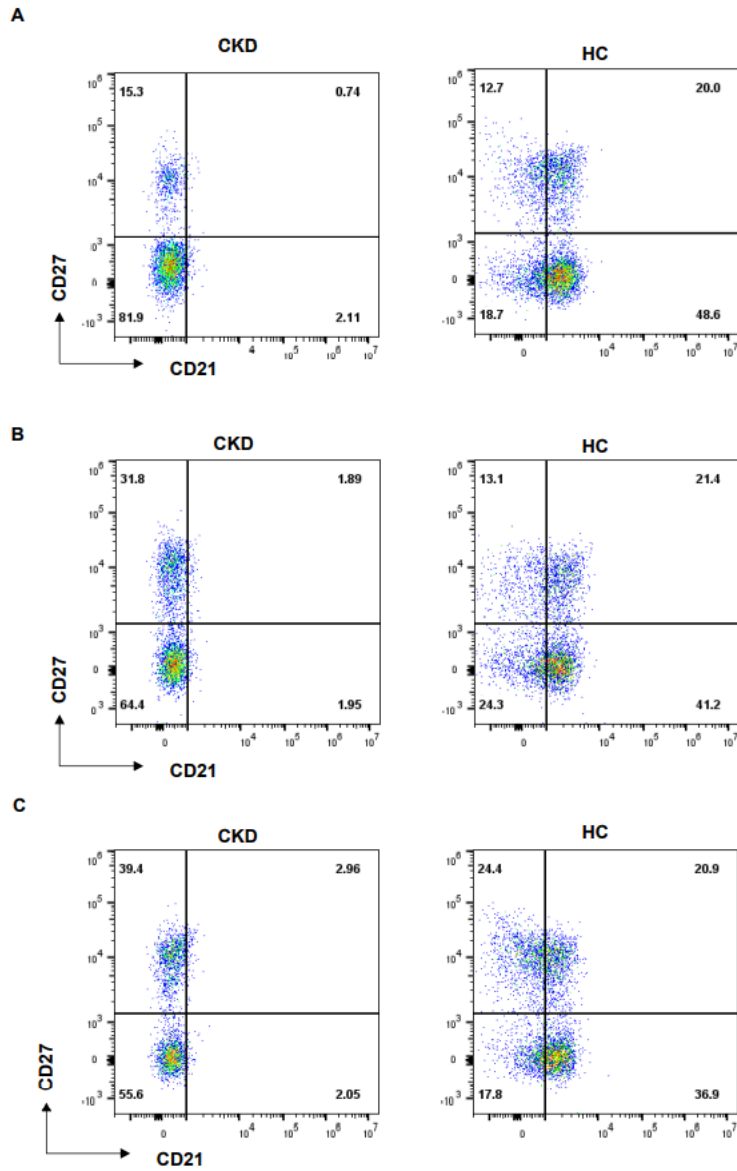

Examples of flow plots of figures. **A:** Examples of flow plots of figure 1E,1F,1G and 1H. **B:** Examples of flow plots of figure 3E,3F,3G and 3H. **C:** Examples of flow plots of figure 4E,4F,4G and 4H.
