# Supplementary material for: Cellular and Humoral Responses to Recombinant and Inactivated SARS-CoV-2 Vaccines in CKD Patients: An Observational Study
Source: J Clin Med. 2023 Feb 3;12(3):1225. doi: 10.3390/jcm12031225 (PMC9918183; doi:10.3390/jcm12031225)
Supplement: Supplementary file 1 [file jcm-12-01225-s001.zip]

Archive with 6 entries (6 files):
- Supplementary Material S1.pdf
- Supplementary Material S2.pdf
- Supplementary Material S3.pdf
- Supplementary Material S4.xlsx
- Supplementary Material S5 Questionnaire on Adverse Reactions to COVID-19 vaccination.pdf
- Supplementary Material S6 original data.xlsx
