# Supplementary material for: Cellular and Humoral Responses to Recombinant and Inactivated SARS-CoV-2 Vaccines in CKD Patients: An Observational Study
Source: J Clin Med. 2023 Feb 3;12(3):1225. doi: 10.3390/jcm12031225 (PMC9918183; doi:10.3390/jcm12031225)
Supplement: Supplementary file 1 [file jcm-12-01225-s001.zip › Supplementary Material S4.xlsx]

## Sheet: Sheet1
Supplementary Table S4.Neutralizing antibody levels in healthy people before and after vaccination.
	“Before-vaccine” healthy controls	“After-vaccine” healthy controls	P
n	17	420
NAbs(IU/ml)	19.04(16.81,23.69)	130.21（65.71，283.7）	<0.001
