# Supplementary material for: Cellular and Humoral Responses to Recombinant and Inactivated SARS-CoV-2 Vaccines in CKD Patients: An Observational Study
Source: J Clin Med. 2023 Feb 3;12(3):1225. doi: 10.3390/jcm12031225 (PMC9918183; doi:10.3390/jcm12031225)
Supplement: Supplementary file 1 [file jcm-12-01225-s001.zip › Supplementary Material S6 original data.xlsx]

## Sheet: CKD patients
Number	Gender	Age（years）	BMI	The vaccine type	Monthes	RBD positive or negative	RBD（BAU/mL）	Nabs（IU/mL）	Nabs positive or negative	RBD-resting MBCs (CD3-CD19+RBD+CD21+CD27+)	RBD-activated MBCs (CD3-CD19+RBD+ CD21-CD27+)	RBD-atypical MBCs (CD3-CD19+RBD+CD21-CD27-)	RBD-intermediate MBCs (CD3-CD19+RBD+CD21+CD27-)
11001	male	54		Inactivated vaccine	3	positive	5.26528	68.04	positive	0.79	15.6	81.5	2.14
11002	male	57	22.1003	Inactivated vaccine	4	positive	7.26574	74.52	positive
11003	male	47	19.9184	Inactivated vaccine	3	negtive	2.54171	53.865	negtive
11004	male	46	31.4359	recombinant vaccine	1	positive	288.248	1305.32	positive
11005	female	47	23.3726	recombinant vaccine	1	positive	543.848	1058.67	positive	2.93	45.7	47.1	4.23
11006	male	47	26.5731	recombinant vaccine	1	positive	263.61	742.365	positive	1.3	31.5	65.9	1.3
11007	male	45	27.7177	recombinant vaccine	1	positive	25.7115	85.86	positive
11008	male	47	26.8566	Inactivated vaccine	3	positive	15.3239	76.95	positive
11009	male	46	21.2228	Inactivated vaccine	2	positive	50.0115	226.395	positive
11010	male	26	21.1203	recombinant vaccine	1	positive	8.8765	103.275	positive	0.92	33	65.1	0.92
11011	male	47	26.449	recombinant vaccine	1	positive	544.714	1685.2	positive	2.04	31.6	64.3	2.04
11012	male	34	41.8733	recombinant vaccine	1	positive	7.58183	51.03	negtive	3.15	36.3	60.1	0.47
11013	female	27	31.6456	recombinant vaccine	2	positive	89.1114	414.315	positive	3.15	39.5	55.2	2.1
11014	male	52	28.0277	Inactivated vaccine	2	positive	13.7607	101.655	positive	1.37	24.3	72.4	1.87
11015	male	47	26.3958	recombinant vaccine	1	positive	172.94	327.645	positive	2.84	55.6	39.9	1.65
11016	male	24	21.2245	Inactivated vaccine	1	negtive	0.85301	40.5	negtive	0.65	41.3	57.8	0.2
11017	female	38	29.6427	Inactivated vaccine	1	positive	29.9246	179.01	positive	2.28	28.8	67	1.9
11018	male	30	22.7732	Inactivated vaccine	1	positive	24.9235	175.365	positive	1.12	40.7	57.8	0.43
11019	male	36	26.5625	Inactivated vaccine	1	positive	39.009	173.34	positive	1.03	22.2	74.9	1.93
11020	male	32	21.7181	recombinant vaccine	1	positive	371.86	2453.09	positive	1.93	31.4	66	0.7
11021	male	70	23.0954	Inactivated vaccine	1	positive	20.4939	104.895	positive	0.43	15.3	82.7	1.61
11022	female	40	19.6283	Inactivated vaccine	1	positive	113.273	331.695	positive	0.27	22	75.9	1.86
11023	male	45	26.2917	Inactivated vaccine	1	positive	25.56	210.195	positive	3.24	52.3	43.8	0.65
11024	male	33	19.1001	Inactivated vaccine	2	negtive	4.2867	49.815	negtive	0.42	69.4	30.1	0.085
11025	female	28	20.7008	Inactivated vaccine	3	positive	13.6482	121.5	positive	2.58	37.3	58.7	1.42
11026	female	68	21.6413	Inactivated vaccine	1	negtive	3.74112	44.55	negtive	4.22	26	63.3	6.49
11027	male	57	24.4473	Inactivated vaccine	3	negtive	2.20397	52.245	negtive	1.6	51.2	45.9	1.33
11028	male	51	26.4463	Inactivated vaccine	3	negtive	1.19075	22.68	negtive	1.61	95.8	2.61	0.016
11029	male	48	20.0474	Inactivated vaccine	3	positive	4.44258	50.22	negtive	0.54	27.6	69.6	2.28
11030	female	74	26.6389	Inactivated vaccine	1	negtive	3.64586	44.955	negtive	1.83	39.7	57.6	0.86
11031	male	49	28.6851	Inactivated vaccine	1	positive	20.1951	124.335	positive	0.82	35.3	63.6	0.29
11032	male	58	48.8281	Inactivated vaccine	1	positive	19.1949	88.29	positive	1.89	49.7	47.9	0.52
11033	female	45	21.0938	Inactivated vaccine	1	positive	98.7673	249.075	positive	1.64	27.8	69.7	0.82
11034	male	19	33.5744	Inactivated vaccine	1	positive	40.243	123.525	positive	0.57	24.3	74.4	0.74
11035	male	24	26.2346	Inactivated vaccine	1	positive	24.287	189.945	positive	2.35	37.4	57.4	2.94
11036	male	56	25.6055	Inactivated vaccine	1	positive	7.12285	67.635	positive	2.82	44.5	51.8	0.94
11037	male	51	27.4348	Inactivated vaccine	3	negtive	2.40315	30.78	negtive	1.5	43	44.9	10.5
11038	male	45	24.8016	Inactivated vaccine	1	positive	79.5854	506.25	positive	1.88	32.5	63.3	2.31
11039	male	19	20.7612	Inactivated vaccine	3	positive	12.951	114.21	positive	1.53	50.1	47.8	0.66
11040	male	19		Inactivated vaccine	2	positive	11.3836	78.57	positive	1.06	46.7	51.4	0.78
11041	male	67		Inactivated vaccine	3	negtive	3.00502	35.64	negtive	1.71	51.4	45.9	1.03
11042	female	33	25.0292	Inactivated vaccine	3	negtive	2.55903	46.575	negtive	15.4	14.1	32.2	38.3
11043	male	33	26.5469	Inactivated vaccine	1	positive	10.7254	95.175	positive	6.32	62.7	29.5	1.5
11044	female	48	17.9813	Inactivated vaccine	1	negtive	1.27302	55.485	negtive	3	44	50	3
11045	female	68	19.4771	Inactivated vaccine	1	positive	160.946	18.63	negtive	0.97	10.3	87.7	1.03
11046	male	53	27.2817	Inactivated vaccine	1	positive	25.0058	140.94	positive	2.01	66.8	30.7	0.5
11047	female	32	29.4321	Inactivated vaccine	1	positive	67.6779	358.02	positive	0.17	38.1	61.6	0.11
11048	female	65	23.8054	recombinant vaccine	3	positive	16.2808	127.98	positive	1.38	25.4	72.3	0.92
11049	female	55	31.1111	Inactivated vaccine	1	positive	8.06246	60.75	positive	0.79	24.7	72.8	1.78
11050	male	74	26.4706	Inactivated vaccine	1	negtive	1.43323	16.605	negtive	3.27	60.8	34.7	1.22
11051	female	57	22.2063	Inactivated vaccine	5	negtive	1.11714	16.605	negtive	0.69	28.5	69.9	0.95
11052	male	67	29.2969	Inactivated vaccine	1	positive	123.318	190.35	positive	0.57	14.4	82.5	2.53
11053	male	68	21.6797	Inactivated vaccine	1	positive	11.4788	55.08	negtive	0.97	51.8	46.1	1.12
11054	male	70	22.3214	recombinant vaccine	1	positive	58.7581	181.035	positive	1.07	30.4	67	1.53
11055	female	47	19.6283	Inactivated vaccine	1	positive	37.5454	143.37	positive	1.28	43.6	48.7	6.41
11056	male	60	19.0311	Inactivated vaccine	1	positive	9.31816	47.79	negtive	0	25	68.8	6.25
11057	male	53	21.2963	Inactivated vaccine	1	positive	25.586	53.055	negtive	0	38	57.7	4.23
11058	male	19	17.5064	recombinant vaccine	3	positive	105.306	486.81	positive	0.14	38.7	60.9	0.29
11059	male	49	28.699	recombinant vaccine	1	positive	7.25708	78.57	positive	0.22	27.6	72	0.17
11060	female	49	18.6709	Inactivated vaccine	1	positive	23.8973	161.595	positive	0.63	58.5	35.2	5.66
11061	female	49	25.7117	Inactivated vaccine	1	positive	5.11373	42.12	negtive	0.18	33.8	65.8	0.18
11062	female	72	28.4618	Inactivated vaccine	1	positive	13.9513	106.11	positive	1.66	51.2	47.2	0
11063	male	73	23.1405	Inactivated vaccine	1	positive	12.2626	90.72	positive	0	14.6	84.6	0.81
11064	female	39	21.3675	Inactivated vaccine	1	positive	21.8795	120.69	positive	1.76	33.9	61.7	2.64
11065	female	38	19.2837	Inactivated vaccine	1	positive	62.0489	179.01	positive	0	23.7	73.7	2.63
11066	male	70	27.6571	Inactivated vaccine	1	positive	50.0548	204.525	positive	0	60.7	32.1	7.14
11067	female	42	26.9531	Inactivated vaccine	2	negtive	0.433	38.475	negtive	1.07	33.6	64.6	0.76
11068	female	61	16.6009	Inactivated vaccine	1	positive	16.7528	140.535	positive	4.94	45.7	47.5	1.85
11069	male	47	22.2656	Inactivated vaccine	3	negtive	4.00525	88.29	positive	1.07	30.9	67	1.01
11070	male	56	19.5184	Inactivated vaccine	3	negtive	0.77507	42.12	negtive	0.48	47.6	51.4	0.6
11071	female	39	34.049	Inactivated vaccine	1	positive	18.0777	97.605	positive	2.46	51.1	46	0.47
11072	male	44		Inactivated vaccine	1	negtive	2.61099	45.36	negtive	0	21.2	75	3.75
11073	male	41		Inactivated vaccine	1	positive	42.9969	278.64	positive	1.39	21.7	74.8	2.12
11074	female	38	24.974	Inactivated vaccine	1	positive	7.95421	84.645	positive	2.92	47.8	48.8	0.48
11075	male	53		Inactivated vaccine	1	negtive	0.433	25.11	negtive	0	92	8	0
11076	male	48		Inactivated vaccine	2	negtive	2.90543	57.915	negtive	1.52	28	68.6	1.89
11077	male	58		Inactivated vaccine		negtive	0.433	45.765	negtive	0.32	51.4	47.5	0.81
11078	female	34		Inactivated vaccine		negtive	1.10848	59.535	negtive	1.55	32.8	64.4	1.27
11079	male	36		recombinant vaccine		negtive	0.433	328.05	positive

## Sheet: hemodialysis patients
Number	Gender	Age（years）	BMI	The vaccine type	Monthes	RBD positive or negative	RBD（BAU/mL）	Nabs（IU/mL）	Nabs positive or negative	RBD-resting MBCs (CD3-CD19+RBD+CD21+CD27+)	RBD-activated MBCs (CD3-CD19+RBD+ CD21-CD27+)	RBD-atypical MBCs (CD3-CD19+RBD+CD21-CD27-)	RBD-intermediate MBCs (CD3-CD19+RBD+CD21+CD27-)
11072	male	44		Inactivated vaccine	1	negtive	2.61099	45.36	negtive	0	21.2	75	3.75
11044	female	48	17.9813	Inactivated vaccine	1	negtive	1.27302	55.485	negtive	3	44	50	3
11076	male	48		Inactivated vaccine	2	negtive	2.90543	57.915	negtive	1.52	28	68.6	1.89
11078	female	34		Inactivated vaccine		negtive	1.10848	59.535	negtive	1.55	32.8	64.4	1.27
11075	male	53		Inactivated vaccine	1	negtive	0.433	25.11	negtive	0	92	8	0
11077	male	58		Inactivated vaccine		negtive	0.433	45.765	negtive	0.32	51.4	47.5	0.81
11056	male	60	19.0311	Inactivated vaccine	1	positive	9.31816	47.79	negtive	0	25	68.8	6.25
11057	male	53	21.2963	Inactivated vaccine	1	positive	25.586	53.055	negtive	0	38	57.7	4.23
11079	male	36		recombinant vaccine		negtive	0.433	328.05	positive
11074	female	38	24.974	Inactivated vaccine	1	positive	7.95421	84.645	positive	2.92	47.8	48.8	0.48
11063	male	73	23.1405	Inactivated vaccine	1	positive	12.2626	90.72	positive	0	14.6	84.6	0.81
11043	male	33	26.5469	Inactivated vaccine	1	positive	10.7254	95.175	positive	6.32	62.7	29.5	1.5
11034	male	19	33.5744	Inactivated vaccine	1	positive	40.243	123.525	positive	0.57	24.3	74.4	0.74
11068	female	61	16.6009	Inactivated vaccine	1	positive	16.7528	140.535	positive	4.94	45.7	47.5	1.85
11060	female	49	18.6709	Inactivated vaccine	1	positive	23.8973	161.595	positive	0.63	58.5	35.2	5.66
11065	female	38	19.2837	Inactivated vaccine	1	positive	62.0489	179.01	positive	0	23.7	73.7	2.63
11008	male	47	26.8566	Inactivated vaccine	3	positive	15.3239	76.95	positive
11064	female	39	21.3675	Inactivated vaccine	1	positive	21.8795	120.69	positive	1.76	33.9	61.7	2.64
11055	female	47	19.6283	Inactivated vaccine	1	positive	37.5454	143.37	positive	1.28	43.6	48.7	6.41
11066	male	70	27.6571	Inactivated vaccine	1	positive	50.0548	204.525	positive	0	60.7	32.1	7.14
11033	female	45	21.0938	Inactivated vaccine	1	positive	98.7673	249.075	positive	1.64	27.8	69.7	0.82
11073	male	41		Inactivated vaccine	1	positive	42.9969	278.64	positive	1.39	21.7	74.8	2.12
11054	male	70	22.3214	recombinant vaccine	1	positive	58.7581	181.035	positive	1.07	30.4	67	1.53

## Sheet: Healthy control
Number	Gender	Age（years）	BMI	The vaccine type	Monthes	RBD positive or negative	RBD（BAU/mL）	Nabs（IU/mL）	Nabs positive or negative	RBD-resting MBCs (CD3-CD19+RBD+CD21+CD27+)	RBD-activated MBCs (CD3-CD19+RBD+ CD21-CD27+)	RBD-atypical MBCs (CD3-CD19+RBD+CD21-CD27-)	RBD-intermediate MBCs (CD3-CD19+RBD+CD21+CD27-)
HC-1	male	25	29.0548	Inactivated vaccine	1	positive	41.6719	193.995	positive	15.5	13	24.4	47.1
HC-2	female	44	30.863	recombinant vaccine	1	positive	1136.19	1531.31	positive	14.4	11.4	18.9	55.3
HC-3	male	32	36.4366	Inactivated vaccine	3	positive	11.4528	109.35	positive	19.3	6.77	11.2	62.7
HC-4	female	35	17.0392	Inactivated vaccine	3	positive	13.895	121.5	positive	33.3	19.6	19.6	27.5
HC-5	male	25	20.4467	Inactivated vaccine	1	positive	36.3417	160.38	positive	24.1	16.4	15.7	43.8
HC-6	female	51	26.0146	Inactivated vaccine	1	positive	28.4698	168.48	positive	19.6	8.91	11.6	59.9
HC-7	male	31	25.0668	Inactivated vaccine	2	positive	45.1619	237.735	positive
HC-8	male	53	25.5391	recombinant vaccine	2
HC-9	female	46	24.4235	Inactivated vaccine	3	positive	5.65065	61.155	positive
HC-10	male	61	25.1651	recombinant vaccine	1
HC-11	male	32	30.4308	Inactivated vaccine	3	negtive	1.89221	25.515	negtive
HC-12	male	51	23.9466	Inactivated vaccine	3	positive	8.45649	85.455	positive
HC-13	male	50	28.7317	recombinant vaccine	1	positive	417.195	2830.14	positive
HC-14	female	38	25.3321	Inactivated vaccine	3	positive	12.3145	90.72	positive
HC-15	male	52	27.8722	recombinant vaccine	1
HC-16	female	52	28.0963	recombinant vaccine	1	positive	1890.48	9954.9	positive
HC-17	female	41	30.4381	recombinant vaccine	1
HC-18	male	49	29.7578	recombinant vaccine	1
HC-19	male	51	26.5731	Inactivated vaccine	2	positive	16.8047	85.05	positive
HC-20	female	44	24.3432	Inactivated vaccine	1	positive	18.3376	116.235	positive	17.3	13.6	25.9	43.2
HC-21	female	30	23.4662	recombinant vaccine	1					31.1	14.1	13.3	41.4
HC-22	female	39	27.1887	Inactivated vaccine	1	positive	4.55516	55.89	negtive	26.6	13.5	11.2	48.7
HC-23	female	36	35.7571	Inactivated vaccine	3	positive	6.22221	42.525	negtive	17.3	8.13	13.6	61
HC-24	male	49	25.2636	Inactivated vaccine	3	positive	4.71104	49.005	negtive	32.2	25.2	23	19.6
HC-25	male	48	29.8373	Inactivated vaccine	3	positive	14.4232	22.275	negtive	46.1	18	8.76	27.1
HC-26	male	29	26.9896	Inactivated vaccine	3	positive	4.48588	46.98	negtive	30.8	16	8.25	44.9
HC-27	male	54	26.1224	recombinant vaccine	1					22.6	11.1	18.9	47.3
HC-28	male	52	26.8544	Inactivated vaccine	2	negtive	3.95329	28.755	negtive
HC-29	male	50	27.9605	Inactivated vaccine	3	positive	6.59026	85.455	positive	30.3	37.9	15.4	16.5
HC-30	female	52	26.168	Inactivated vaccine	2	positive	7.33935	46.17	negtive	31.7	16.9	15.5	35.8
HC-31	male	48	24.2792	recombinant vaccine	2					32.1	24.6	13.3	30
HC-32	male	32	27.5022	Inactivated vaccine	1	positive	42.4253	159.165	positive	19.3	18.4	27.7	34.6
HC-33	female	53	24.4546	recombinant vaccine	1					12	10.5	23.7	53.8
HC-34	male	42	23.3747	Inactivated vaccine	2	positive	25.7072	162.405	positive	24.2	18.7	14.8	42.2
HC-35	female	50	23.9158	recombinant vaccine	2					37.3	28.4	13.6	20.7
HC-36	male	46	28.7801	recombinant vaccine	1	positive	55.6405	238.545	positive	15.2	7.28	20.6	57
HC-37	female	52	28.764	recombinant vaccine	2					17.3	9.46	12.1	61.1
HC-38	female	59	26.6667	recombinant vaccine	1					25.6	16.9	25.7	31.9
HC-39	male	28	25.1851	recombinant vaccine	2					31.9	17.5	13.5	37.1
HC-40	female	38	27.6058	recombinant vaccine	2					23.4	18.1	19.5	39
HC-41	female	32	29.5918	Inactivated vaccine	2	positive	20.4463	116.64	positive	23.6	15.8	28.4	32.2
HC-42	male	27	24.8537	recombinant vaccine	1					19	12.3	16.7	51.9
HC-43	male	21	26.8519	recombinant vaccine	1					25.6	13.7	19.2	41.5
HC-44	male	45	27.31	Inactivated vaccine	2	positive	13.1242	83.025	positive	35	40	9.72	15.2
HC-45	male	36	26.3224	recombinant vaccine	2					23.2	14.2	17.6	45
HC-46	female	45	23.2458	recombinant vaccine	1					12.3	16.1	36.3	35.4
HC-47	male	58	25.9795	recombinant vaccine	1	positive	43.9928	181.845	positive	20.6	20.1	22.7	36.6
HC-48	female	32	24.8445	Inactivated vaccine	3	positive	17.6058	72.495	positive	21.4	13.5	16.7	48.3
HC-49	female	36	26.6747	recombinant vaccine	1	positive	282.1	1107.67	positive	24.1	11.5	14.5	49.9
HC-50	male	40	30.7494	recombinant vaccine	2					16.5	17.2	22.6	43.8
HC-51	male	64	28.0826	Inactivated vaccine	1	positive	57.7189	164.43	positive	15.4	16.1	21	47.5
HC-52	male	42	28.0102	Inactivated vaccine	2	positive	9.06269	55.08	negtive	21.7	11.8	18.1	48.5
HC-53	female	50	25.2081	Inactivated vaccine	2	positive	9.51301	76.545	positive	24.4	19.3	25.5	30.8
HC-54	female	34	30.7574	Inactivated vaccine	3	positive	54.7312	183.87	positive	14.3	11.1	24.5	50.1
HC-55	female	39	25.089	recombinant vaccine	2					15.5	17.5	31.7	35.2
HC-56	male	42	28.5032	Inactivated vaccine	3	positive	27.7986	132.435	positive	17.2	19	18	45.8
HC-57	male	52	27.0412	recombinant vaccine	2					38.7	20.4	17.2	23.7
HC-58	male	38	32.9343	Inactivated vaccine	1	positive	59.4509	217.89	positive	29.6	18.2	20.8	31.4
HC-59	female	51	25.3749	Inactivated vaccine	2	negtive	3.31678	12.15	negtive	9.97	7.32	42.2	40.5
HC-60	female	35	24.2694	Inactivated vaccine	3	positive	7.14883	61.56	positive	36.3	17.3	12.8	33.6
HC-61	female	58	27.7283	Inactivated vaccine	3	positive	8.13607	97.2	positive	12.6	9.98	21	56.4
HC-62	male	53	32.1808	Inactivated vaccine	3	negtive	2.09139	19.845	negtive	17.7	14.3	15.2	52.7
HC-63	female	52	26.2692	Inactivated vaccine	3	negtive	2.42047	29.16	negtive	7.31	9.58	31.9	51.2
HC-64	male	31	24.4683	recombinant vaccine	2					30.5	15.8	17.2	36.4
HC-65	female	55	28.1026	Inactivated vaccine	3	negtive	3.01801	21.87	negtive	3.51	3.14	33	60.3
HC-66	male	31	25.4437	recombinant vaccine	1					13.1	9.92	17.1	59.9
HC-67	male	48	30.038	recombinant vaccine	1					5.99	5.83	26.3	61.9
HC-68	female	57	28.3652	Inactivated vaccine	2	positive	10.5652	70.875	positive	49.6	24.9	17.2	8.34
HC-69	male	37	24.093	Inactivated vaccine	1	positive	24.7243	91.935	positive	10.1	6.15	21.1	62.7
HC-70	female	55	25.9738	recombinant vaccine	2					37.7	33.2	18.4	10.8
HC-71	female	57	27.3401	Inactivated vaccine	2	positive	19.9526	70.065	positive	12.8	15.6	14.7	56.9
HC-72	female	25	25.7466	recombinant vaccine	2					30.4	20.5	15.5	33.5
HC-73	female	53	26.7605	recombinant vaccine	2					18.2	11.4	16.7	53.7
HC-74	male	50	25.2645	Inactivated vaccine	2	positive	14.8476	112.185	positive	28.8	36.2	18.8	16.1
HC-75	female	40	24.0882	recombinant vaccine	1	positive	455.949	1039.63	positive	9.44	5.89	10.4	74.2
HC-76	female	52	31.8065	Inactivated vaccine	2	positive	15.7309	107.325	positive	25.7	16.3	19.9	38
HC-77	female	41	27.1755	Inactivated vaccine	3	positive	11.8122	90.315	positive	21.3	15.8	20.9	42
HC-78	female	27	26.0845	recombinant vaccine	1					39.8	9.71	11.2	39.3
HC-79	male	58	28.0006	Inactivated vaccine	1	positive	11.8382	26.325	negtive	46	23.4	10.3	20.3
HC-80	male	55	29.0083	Inactivated vaccine	2	positive	11.1108	29.565	negtive	17	10.6	18.4	54
HC-81	female	19	32.2708	recombinant vaccine	1					11.8	5.35	23.6	59.2
HC-82	male	25	29.5452	recombinant vaccine	3					40.6	17	9.26	33.2
HC-83	male	22	29.6641	Inactivated vaccine	1	positive	27.0625	76.545	positive	24.2	10.9	17.2	47.6
HC-84	male	66	31.6739	Inactivated vaccine	1	positive	14.8389	44.55	negtive	23.3	14.7	18.2	43.8
HC-85	male	58	26.3905	Inactivated vaccine	2	positive	395.589	718.065	positive	10.5	12.5	38.2	38.8
HC-86	female	57	24.9124	recombinant vaccine	1					3.68	3.58	25.4	67.4
HC-87	female	51	28.5323	recombinant vaccine	1	positive	51.094	250.29	positive	8.67	6.22	23.1	62.1
HC-88	male	56	25.7761	Inactivated vaccine	3	positive	33.1202	164.43	positive	26.7	16.8	13.4	43.2
HC-89	male	38	37.4873	recombinant vaccine	1	positive	96.4724	545.535	positive	13.9	9.27	24.3	52.5
HC-90	female	35	28.1852	recombinant vaccine	2					43.8	22.1	9.24	24.8
HC-91	female	33	33.0222	Inactivated vaccine	1	positive	36.779	158.76	positive	33.6	12.5	16	38
HC-92	female	37	25.893	recombinant vaccine	2					14.1	7.13	18.9	59.9
HC-93	female	37	24.2787	recombinant vaccine	2					25	9.23	19.7	46
HC-94	male	40	27.3484	recombinant vaccine	2					18.6	9.01	20.6	51.8
HC-95	male	29	29.8449	recombinant vaccine	2					14.9	7.71	27.9	49.5
HC-96	female	27	24.9131	recombinant vaccine	1	positive	659.459	3223.8	positive	19	10.8	23.3	46.9
HC-97	female	58	24.8047	recombinant vaccine	3					30.5	11.9	11.5	46.1
HC-98	male	34	29.2311	recombinant vaccine	2					14.3	6.35	8.26	71.1
HC-99	male	39	32.2834	Inactivated vaccine	1	positive	47.9764	166.86	positive	20	10.2	18.3	51.5
HC-100	female	47	27.0552	recombinant vaccine	1					12.7	8.58	20.5	58.2
HC-101	male	36	28.8634	Inactivated vaccine	2	positive	24.9105	106.11	positive	21	17.2	21.5	40.2
HC-102	male	24	29.4457	Inactivated vaccine	2	positive	23.3603	140.94	positive	22.9	17.5	15.5	44.2
HC-103	female	51	24.2439	recombinant vaccine	2					36.6	21.5	19.5	22.4
HC-104	female	42	28.0623	recombinant vaccine	2					22.9	14.8	16.8	45.5
HC-105	female	52	26.5321	recombinant vaccine	2					20	15.6	22.7	41.6
HC-106	female	44	26.0291	recombinant vaccine	1					16.5	13.6	20.6	49.4
HC-107	male	39	28.5994	Inactivated vaccine	2	positive	9.84209	69.66	positive	18.3	14.9	17.7	49
HC-108	male	61	26.8898	recombinant vaccine	2					25.5	22	24.7	27.8
HC-109	male	39	28.6621	recombinant vaccine	2					28.3	21.9	14.3	35.5
HC-110	male	55	26.3841	Inactivated vaccine	3	positive	6.2785	44.55	negtive	8.11	7.63	40.3	43.9
HC-111	male	48	26.8503	Inactivated vaccine	3	positive	178.916	397.305	positive	19.4	13.7	21.7	45.2
HC-112	male	70	25.8797	recombinant vaccine	2					29.6	24.5	26.4	19.6
HC-113	male	66	24.0221	recombinant vaccine	2					18.4	17.7	22.4	41.6
HC-114	female	61	26.0218	recombinant vaccine	2					22.6	18.6	22.1	36.7
HC-115	female	29	25.5923	Inactivated vaccine	3	positive	27.699	115.425	positive	17.9	12	15.2	55
HC-116	female	46	29.2195	Inactivated vaccine	2	positive	29.3271	102.87	positive	8.98	8.96	26.4	55.7
HC-117	female	48	29.2021	Inactivated vaccine	1	positive	19.7405	66.42	positive	19.4	9.54	17.3	53.8
HC-118	male	40	26.0748	recombinant vaccine	2					24	22.9	18.4	34.7
HC-119	female	61	27.2752	Inactivated vaccine	2	positive	29.379	93.15	positive	22.4	18.8	24.7	34.1
HC-120	male	61	25.3679	Inactivated vaccine	2	positive	11.9075	84.645	positive	16.9	24.9	28.7	29.5
HC-121	male	39	27.5087	Inactivated vaccine	1	positive	46.2444	129.6	positive	26.2	28.4	17.6	27.8
HC-122	male	49	30.2694	Inactivated vaccine	3	positive	4.47722	37.26	negtive	20.4	18.1	28.9	32.6
HC-123	male	37	24.4646	Inactivated vaccine	1	negtive	3.38173	34.83	negtive	11.6	7.82	22.3	58.3
HC-124	male	47	25.1781	Inactivated vaccine	3	negtive	2.26892	13.365	negtive	6.47	6.11	28	59.4
HC-125	male	55	30.9685	Inactivated vaccine	3	positive	6.21355	49.005	negtive	15.1	10.6	31.8	42.5
HC-126	female	52	27.5851	Inactivated vaccine	3	positive	17.6188	55.89	negtive	10	8.68	18.1	63.2
HC-127	male	49	25.2781	recombinant vaccine	2					21.7	18.4	23.5	36.4
HC-128	female	53	28.4672	Inactivated vaccine	3	negtive	3.6805	27.945	negtive	18	9.53	25.5	46.9
HC-129	male	53	25.8637	recombinant vaccine	2					30.2	21	13.5	35.4
HC-130	male	41	24.2123	Inactivated vaccine	3	positive	66.0325	47.385	negtive	22.9	18.5	20.2	38.5
HC-131	male	41	27.5466	recombinant vaccine	2					14.4	11	14.3	60.3
HC-132	male	68	27.8001	Inactivated vaccine	2	positive	10.89	53.46	negtive	8.38	9.18	25.3	57.1
HC-133	male	65	30.076	recombinant vaccine	3					15.8	14.5	29.6	40.2
HC-134	female	37	27.7443	recombinant vaccine	2					33.1	15.5	18.8	32.6
HC-135	female	67	29.2092	recombinant vaccine	2					14.9	7.99	25.5	51.6
HC-136	male	28	27.203	recombinant vaccine	2					16.1	9.84	26.7	47.4
HC-137	female	41	26.5036	Inactivated vaccine	2	positive	65.383	335.34	positive	33.7	32.6	15.3	18.4
HC-138	female	36	29.5083	Inactivated vaccine	2	positive	53.0858	189.945	positive	24.1	12.8	15.2	47.8
HC-139	male	57	24.3496	Inactivated vaccine	2	positive	17.4889	120.69	positive	21.4	12.8	31.9	34
HC-140	male	57	24.5432	Inactivated vaccine	3	negtive	3.86236	18.225	negtive	11.9	11.8	27.5	48.8
HC-141	male	34	24.45	Inactivated vaccine	1	positive	28.9417	115.425	positive	32.3	32.2	14.6	20.9
HC-142	male	61	25.6165	Inactivated vaccine	2	positive	28.2792	96.795	positive	28.8	30.8	17	23.4
HC-143	female	48	24.1282	Inactivated vaccine	3	positive	8.90681	60.75	negtive	12	7.19	36.1	44.8
HC-144	female	52	25.8062	Inactivated vaccine	3	positive	13.7737	122.715	positive	19	11.1	27.8	42.1
HC-145	male	32	25.7908	Inactivated vaccine	3	negtive	4.0269	13.365	negtive	22.9	16.3	19.8	41
HC-146	female	50	27.7244	recombinant vaccine	2					25.1	9.28	15.2	50.5
HC-147	female	36	29.9039	recombinant vaccine	2					16	12.9	14	57.1
HC-148	female	29	28.125	Inactivated vaccine	2	positive	35.6272	75.735	positive	29.6	12.2	13.5	44.7
HC-149	male	24	28.9351	Inactivated vaccine	2	negtive	3.39472	19.035	negtive	22.4	18.5	18.2	41
HC-150	male	36	28.5255	Inactivated vaccine	1	positive	37.0778	190.755	positive	32.5	22.7	17.3	27.5
HC-151	male	37	24.2639	Inactivated vaccine	1	positive	24.5165	192.375	positive	9.61	9.87	15.4	65.1
HC-152	male	34	26.5377	Inactivated vaccine	2	positive	70.3192	182.25	positive	18.3	12.3	32.1	37.2
HC-153	female	28	28.6785	Inactivated vaccine	1	positive	29.6951	91.935	positive	20.8	10.9	23.4	44.9
HC-154	male	29	24.0569	Inactivated vaccine	2	positive	5.03146	25.11	negtive	16.2	14	27.8	42
HC-155	male	43	27.8722	recombinant vaccine	3					40.4	21.4	6.38	31.8
HC-156	female	36	25.471	recombinant vaccine	2					21.7	11.9	20.9	45.5
HC-157	female	62	24.2568	Inactivated vaccine	2	positive	16.2072	67.23	positive	12.1	7.5	19.8	60.6
HC-158	male	37	25.8951	recombinant vaccine	3					30.2	14.9	17.5	37.4
HC-159	male	31	31.0276	recombinant vaccine	2					34.3	24.1	12.2	29.5
HC-160	male	38	27.7008	Inactivated vaccine	1	positive	7.49956	12.15	negtive	18.2	10.6	18.9	52.3
HC-161	male	32	24.3083	recombinant vaccine	3					27.3	18.5	21.3	33
HC-162	male	33	24.1115	Inactivated vaccine	1	positive	42.6462	154.305	positive	20.6	13.5	25.8	40.1
HC-163	male	34	34.0554	recombinant vaccine	3					31.1	13.6	10.3	44.9
HC-164	male	48	25.4432	recombinant vaccine	2					7.86	5.37	19.3	67.5
HC-165	male	24	26.4509	recombinant vaccine	3					32.8	21.1	14.7	31.4
HC-166	male	37	30.225	recombinant vaccine	2					40.3	26.2	8.56	25
HC-167	male	24	37.8072	recombinant vaccine	3					14.4	7.6	45.5	32.5
HC-168	male	25	32.0127	Inactivated vaccine	2	positive	16.6445	70.875	positive	21.9	19	19.4	39.7
HC-169	male	41	24.0991	Inactivated vaccine	2	positive	59.7973	175.77	positive	21	15.1	24.6	39.4
HC-170	female	61	24.3375	recombinant vaccine	2					24.6	13.1	28.7	33.6
HC-171	male	52	25.3906	Inactivated vaccine	1	positive	8.9198	26.325	negtive	31.8	25.9	13.6	28.7
HC-172	male	59	24.4494	Inactivated vaccine	2	positive	91.5362	424.845	positive	42.7	21	9.92	26.3
HC-173	male	57	25.0572	Inactivated vaccine	2	positive	56.4199	304.965	positive	17.6	14.2	19.9	48.3
HC-174	male	47	25.2886	recombinant vaccine	3					36.8	28.2	15.8	19.1
HC-175	female	39	25.204	Inactivated vaccine	2	positive	33.1332	138.51	positive	24.1	21.6	18	36.2
HC-176	male	24	36.69	Inactivated vaccine	1	positive	52.393	303.75	positive	9.24	6.91	19	64.9
HC-177	male	37	25.1149	Inactivated vaccine	3	positive	4.81063	35.64	negtive	34.1	15.7	15	35.3
HC-178	male	20	15.5613	recombinant vaccine	1	positive	455.949	2118.55	positive	18.9	9.14	18.5	53.4
HC-179	female	21	19.5312	recombinant vaccine	1	positive	296.389	841.59	positive	28	12.8	11.7	47.5
HC-180	female	21	19.3337	recombinant vaccine	1	positive	736.966	1443.83	positive	11	6.12	25.6	57.2
HC-181	female	25	17.4251	recombinant vaccine	1	positive	857.773	2953.66	positive
HC-182	male	41	27.7551	Inactivated vaccine	1	positive	84.868	270.945	positive
HC-183	male	31	27.0416	Inactivated vaccine	3	positive	10.9073	81.405	positive	45.4	23	7.23	24.3
HC-184	female	31	25.7778	Inactivated vaccine	3	positive	4.9362	61.155	positive	15.4	7.69	13.1	63.9
HC-185	male	44	24.2215	Inactivated vaccine	3	positive	61.3994	172.125	positive	35.5	16.7	9	38.9
HC-186	female	35	24.7768	recombinant vaccine	1	positive	103.704	390.42	positive
HC-187	female	43	19.1111	recombinant vaccine	1	positive	263.567	802.305	positive	42.3	22.5	15.4	19.9
HC-188	male	50	26.4463	Inactivated vaccine	1	positive	64.6469	221.13	positive	35.9	14.5	7.84	41.8
HC-189	male	56	24.2215	Inactivated vaccine	1	negtive	4.18711	39.285	negtive	32.5	22.8	14.3	30.5
HC-190	female	46	26.6667	Inactivated vaccine	3	positive	24.4948	133.245	positive	24.8	17.8	25.2	32.2
HC-191	male	34	24.5247	Inactivated vaccine	3	positive	5.89313	39.285	negtive	51.5	21.5	6.32	20.7
HC-192	female	35	26.7759	recombinant vaccine	1	positive	685.872	1934.68	positive	11.8	5.93	12.3	69.9
HC-193	female	25	17.5119	Inactivated vaccine	1	positive	110.372	657.315	positive	17	9.6	15	58.4
HC-194	female	32	22.8928	Inactivated vaccine	3	positive	5.88447	64.395	positive	21.1	7.7	14.9	56.3
HC-195	male	48	25.9516	Inactivated vaccine	3	negtive	1.06951	40.095	negtive	22.4	16.5	14.8	46.3
HC-196	female	33	34.1311	recombinant vaccine	1	positive	285.174	961.47	positive	39.6	15.5	8.39	36.6
HC-197	female	33	21.4903	recombinant vaccine	1	positive	817.071	3821.18	positive	36.4	18	9.48	36.1
HC-198	female	39	21.8522	recombinant vaccine	1	positive	909.733	3892.05	positive	30.3	14.6	11.9	43.2
HC-199	female	47	23.0112	recombinant vaccine	1	positive	554.24	2105.59	positive
HC-200	female	38	20.0773	Inactivated vaccine	1	positive	19.4634	163.62	positive	26.4	14.1	24.2	35.2
HC-201	male	38	22.3954	Inactivated vaccine	3	negtive	2.28624	65.205	positive	29.8	12.8	16.7	40.7
HC-202	male	58	23.9512	Inactivated vaccine	3	negtive	3.13492	53.865	negtive	19.4	9.99	18.1	52.4
HC-203	female	44	24.3418	Inactivated vaccine	3	negtive	2.53738	41.31	negtive	11.5	7.01	27.9	53.6
HC-204	female	54	23.4586	Inactivated vaccine	1	positive	6.41706	59.13	negtive	20.6	15.1	22.7	41.6
HC-205	female	58	27.268	Inactivated vaccine	2	negtive	2.86646	34.425	negtive	7.08	4.53	19.1	69.3
HC-206	male	66	25.7117	Inactivated vaccine	2	negtive	2.41614	39.285	negtive	24.3	13.8	16.2	45.7
HC-207	female	48	22.8624	recombinant vaccine	1	positive	43.6464	176.985	positive
HC-208	female	28	19.3337	recombinant vaccine	1	positive	1242.71	4126.95	positive	12.6	7.38	21.2	58.9
HC-209	female	32	19.8681	Inactivated vaccine	3	positive	16.7311	132.84	positive	32	8.93	6.46	52.6
HC-210	female	29	20.9572	recombinant vaccine	1	positive	817.071	4212	positive	20.7	8.31	11.4	59.5
HC-211	female	57	22.4766	Inactivated vaccine	3	positive	5.01414	70.875	positive	8.6	4.89	26.9	59.6
HC-212	female	58	21.2585	Inactivated vaccine	3	positive	18.7879	140.94	positive	23.2	9.4	17.1	50.3
HC-213	female	35	20.9366	Inactivated vaccine	1	positive	79.0225	417.15	positive	26.5	11.6	9.29	52.7
HC-214	female	37	23.634	Inactivated vaccine	3	positive	8.52144	60.75	negtive	21.2	7.91	10.7	60.3
HC-215	male	52	27.6361	Inactivated vaccine	3	negtive	2.45511	45.765	negtive	16.5	12.4	18.3	52.7
HC-216	male	37	20.3125	Inactivated vaccine	3	positive	11.5308	108.945	positive	36.2	10.8	11.8	41.2
HC-217	male	28	28.6851	Inactivated vaccine	2	negtive	3.36874	66.015	positive	30.9	17.6	22.4	29.1
HC-218	male	58	23.8751	recombinant vaccine	2	positive	136.049	473.445	positive	39.5	24	15.5	20.9
HC-219	female	60	21.875	Inactivated vaccine	2	positive	9.55631	89.1	positive	17.3	24.2	19.8	38.7
HC-220	female	53	21.875	Inactivated vaccine	2	positive	19.7665	158.355	positive	21.9	18.9	25.9	33.3
HC-221	male	58	21.875	Inactivated vaccine	2	positive	9.52167	76.14	positive	30.2	21.4	21.4	27
HC-222	female	53	28.0404	Inactivated vaccine	2	negtive	2.30789	53.46	negtive
HC-223	male	24	24.2424	Inactivated vaccine	3	positive	21.2776	139.32	positive	25.3	16.7	17.7	40.3
HC-224	male	53	24.093	Inactivated vaccine	3	negtive	2.61099	24.3	negtive	36.7	20.1	14.4	28.9
HC-225	female	46	20.2848	Inactivated vaccine	2	negtive	3.65452	54.675	negtive	28.2	18.3	17.8	35.7
HC-226	female	46	20.7756	recombinant vaccine	1	positive	1164.34	12150	positive
HC-227	male	55	22.4913	Inactivated vaccine	3	negtive	1.6887	44.145	negtive	24.3	18.4	19.7	37.6
HC-228	male	26	20.0474	recombinant vaccine	1	positive	1219.76	8756.1	positive	9.45	6.47	27.9	56.2
HC-229	female	38	21.4692	Inactivated vaccine	3	positive	16.913	134.46	positive	34.8	15	14.2	36
HC-230	female	28	22.0317	recombinant vaccine	1	positive	217.323	955.8	positive	27.2	14.6	11.7	46.5
HC-231	male	52	27.2392	recombinant vaccine	1	positive	777.668	2253.01	positive	20.5	10.7	20.5	48.3
HC-232	male	55	26.7539	recombinant vaccine	1	positive	12.8947	102.465	positive	33.4	14.4	14.2	38
HC-233	female	47	18.2857	recombinant vaccine	1	positive	197.665	721.71	positive
HC-234	female	45	19.5799	recombinant vaccine	1	positive	55.1209	203.715	positive
HC-235	male	46	30.132	recombinant vaccine	1	positive	132.281	549.99	positive	26.9	23.4	24.1	25.6
HC-236	male	44	26.4236	recombinant vaccine	1	positive	21.6803	127.575	positive	20.4	15.4	14.5	49.7
HC-237	female	27	17.3604	recombinant vaccine	1	positive	397.927	1239.3	positive	20.9	11.4	16.4	51.2
HC-238	male	52	20.4382	recombinant vaccine	1	positive	11.0328	92.34	positive	25.5	27.9	13.3	33.3
HC-239	female	24	18.3143	Inactivated vaccine	2	positive	35.9866	195.21	positive	28.7	20.6	21.7	29.1
HC-240	female	37	21.4844	Inactivated vaccine	1	positive	36.0689	178.2	positive
HC-241	female	25	19.487	Inactivated vaccine	3	positive	8.77258	108.54	positive
HC-242	male	45	24.7249	recombinant vaccine	1	positive	752.121	2396.38	positive
HC-243	male	36	24.8016	recombinant vaccine	1	positive	257.722	394.065	positive
HC-244	female	34	19.9755	Inactivated vaccine	3	negtive	3.87102	72.495	positive
HC-245	female	27	20.5688	Inactivated vaccine	3	positive	7.20945	78.57	positive
HC-246	female	24	17.4044	Inactivated vaccine	3	positive	19.6062	102.06	positive
HC-247	male	29	26.5285	recombinant vaccine	1	positive	234.253	1440.99	positive
HC-248	male	32	31.2461	recombinant vaccine	1	positive	434.732	2178.09	positive
HC-249	male	33	23.5294	Inactivated vaccine	3	positive	7.99318	59.94	negtive
HC-250	male	35	24.8016	recombinant vaccine	1	positive	128.168	433.35	positive
HC-251	male	34	27.5482	recombinant vaccine	1	positive	172.161	682.83	positive
HC-252	male	42	29.2359	Inactivated vaccine	1
HC-253	male	58	28.3447	recombinant vaccine	2	positive	64.4737	260.01	positive
HC-254	male	32	21.8724	Inactivated vaccine	2	positive	19.3897	125.955	positive
HC-255	female	33	18.4265	Inactivated vaccine	2	positive	7.13151	83.43	positive
HC-256	female	24	19.2277	recombinant vaccine	1	positive	267.464	737.505	positive
HC-257	female	27	20.5693	Inactivated vaccine	1	positive	37.632	180.225	positive
HC-258	female	23	18.4421	Inactivated vaccine	3	positive	182.423	816.885	positive
HC-259	male	61	22.6757	Inactivated vaccine	2	positive	8.81588	70.47	positive	15.1	14.8	22.2	47.9
HC-260	male	46	24.1633	recombinant vaccine	2	positive	181.947	739.935	positive	16.6	19.2	28.7	35.6
HC-261	male	58	26.6389	Inactivated vaccine	3	positive	12.7822	116.64	positive	24.8	24.5	25.8	24.9
HC-262	male	44	22.4913	Inactivated vaccine	1	positive	18.9957	154.71	positive	33.1	21.2	20.1	25.7
HC-263	male	46	25.5102	recombinant vaccine	1	positive	69.1068	386.37	positive	27.8	18.3	19.5	34.4
HC-264	male	52	22.4059	Inactivated vaccine	2	positive	4.68939	67.635	positive	31.8	19.7	15.5	33
HC-265	female	39	21.0272	Inactivated vaccine	3	positive	95.3033	193.995	positive	20.8	9.47	18.4	51.3
HC-266	male	33	26.8612	Inactivated vaccine	1	positive	34.8132	251.1	positive	39.3	18.4	12.7	29.6
HC-267	male	58	20.7415	recombinant vaccine	1	positive	13.6179	126.765	positive	13.2	18.6	26.2	42.1
HC-268	male	61	31.0204	recombinant vaccine	1	positive	82.4865	364.905	positive	16.4	13.3	19.5	50.8
HC-269	male	53	25.4714	recombinant vaccine	1	positive	4.79764	57.105	negtive	31.5	33.1	12.4	22.9
HC-270	female	55	20.5469	Inactivated vaccine	2	positive	8.19236	71.28	positive
HC-271	male	24	24.4646	Inactivated vaccine	1	positive	64.8634	232.875	positive	21.7	12.8	19.9	45.6
HC-272	female	24	18.2066	Inactivated vaccine	2	positive	16.2895	101.655	positive	19.8	16.7	21.1	42.4
HC-273	male	43	19.0311	Inactivated vaccine	3	positive	7.75503	74.925	positive	25	39.4	12.5	23.1
HC-274	female	39	22.2656	recombinant vaccine	1	positive	807.545	4604.85	positive	39.9	20.1	10.8	29.2
HC-275	female	26	20.3125	recombinant vaccine	1	positive	201.518	700.245	positive	25.8	9.7	19.8	44.7
HC-276	female	25	19.1467	recombinant vaccine	1	positive	400.828	1312.61	positive	31.8	21	21.7	25.5
HC-277	male	65	28.4512	Inactivated vaccine	1	positive	45.7248	166.86	positive	18	13.4	21.2	47.5
HC-278	female	44	21.9899	Inactivated vaccine	1	positive	333.627	1012.9	positive	30.5	23.9	13.2	32.4
HC-279	male	29	21.9713	Inactivated vaccine	1	positive	6.33046	63.585	positive	26.6	13.7	19.1	40.6
HC-280	male	34	24.3375	Inactivated vaccine	2	positive	26.7291	130.41	positive	25.4	19.7	20.1	34.9
HC-281	female	40	25.0361	Inactivated vaccine	2	positive	5.68096	53.055	negtive	15.8	7.89	19.1	57.2
HC-282	male	42	23.8751	Inactivated vaccine	2	positive	31.5744	175.77	positive	19.5	19.8	23.6	37.1
HC-283	male	40	22.8571	recombinant vaccine	2	positive	78.3297	426.465	positive	23.6	20.8	23.9	31.7
HC-284	male	29	22.0932	Inactivated vaccine	3	positive	8.49113	67.635	positive	9.9	7.28	33.2	49.6
HC-285	male	32	21.5139	Inactivated vaccine	3	positive	24.6074	176.985	positive	24	16.8	19.4	39.8
HC-286	female	56	23.2335	recombinant vaccine	1	positive	624.386	2133.54	positive
HC-287	female	37	21.3039	recombinant vaccine	1	positive	116.087	372.195	positive	12.1	7.36	28.2	52.3
HC-288	female	65	22.1275	recombinant vaccine	1	positive	532.59	2472.12	positive
HC-289	female	33	21.8741	recombinant vaccine	1	positive	1740.23	12150	positive	27.5	15.8	13.6	43
HC-290	female	31	27.7344	recombinant vaccine	1	positive	302.277	2105.19	positive	19.5	18.4	19.7	42.4
HC-291	female	54	27.7778	Inactivated vaccine	1	negtive	2.97471	44.145	negtive	13.2	7.84	22	57
HC-292	female	54	26.1752	Inactivated vaccine	1	negtive	1.29467	26.73	negtive	19	10.4	36.4	34.2
HC-293	female	54	27.7778	Inactivated vaccine	1	positive	109.159	418.77	positive	14.7	15.4	29.8	40.1
HC-294	female	23	22.8928	recombinant vaccine	2	positive	953.466	4155.3	positive	24	15	14.9	46
HC-295	female	50	22.8928	Inactivated vaccine	2	positive	7.93256	81	positive	27.7	19.1	22.3	30.9
HC-296	female	57	20.9572	Inactivated vaccine	2	positive	8.66433	61.155	positive	22.3	10.6	18.3	48.7
HC-297	male	61	23.5294	recombinant vaccine	2	positive	81.2741	349.11	positive	8.38	19.9	36.4	35.3
HC-298	female	36	18.3655	recombinant vaccine	1	positive	905.403	1977.21	positive
HC-299	male	68	21.9723	Inactivated vaccine	1	positive	12.5657	121.905	positive	16.2	20.6	22.7	40.4
HC-300	female	60	21.1927	Inactivated vaccine	1	positive	28.1926	130.005	positive	12.9	13	36.9	37.2
HC-301	female	62	25.6745	Inactivated vaccine	1	positive	41.6589	175.365	positive	19.7	15.2	25.9	39.2
HC-302	female	50	27.268	Inactivated vaccine	1	positive	48.7991	180.225	positive	11.3	10.4	32.3	45.9
HC-303	female	21	18.3655	Inactivated vaccine	1	positive	7.58183	84.24	positive	40.1	26.7	11.7	21.5
HC-304	male	68	24.8016	recombinant vaccine	1	positive	18.4458	58.725	negtive	9.41	16.4	18.3	55.9
HC-305	female	34	23.1473	Inactivated vaccine	1	positive	42.7155	145.8	positive	36.3	19.3	14.2	30.2
HC-306	female	53	23.4375	recombinant vaccine	2	positive	656.861	1250.24	positive	21.3	19	17.7	42
HC-307	male	63	24.7249	Inactivated vaccine	3	positive	14.9602	110.97	positive	28.7	24.5	18.9	27.9
HC-308	male	49	23.1364	recombinant vaccine	2	positive	20.9875	140.13	positive	10.2	14.1	39.4	36.3
HC-309	female	51	24.974	recombinant vaccine	1	positive	45.7681	202.905	positive
HC-310	male	64	21.2953	recombinant vaccine	1	positive	116.737	425.25	positive	21.4	23.9	20.9	33.8
HC-311	male	75	32.1003	Inactivated vaccine	1	positive	19.2122	107.73	positive	6.18	5.48	35.1	53.2
HC-312	male	48	28.8761	recombinant vaccine	1	positive	85.9072	338.175	positive	26.3	21.5	21	31.2
HC-313	female	24	16.7969	Inactivated vaccine	1	positive	35.5103	155.52	positive	16.8	9.64	23.5	50.1
HC-314	male	67	26.5089	recombinant vaccine	2	positive	238.237	479.115	positive	14.6	18.4	23.5	43.5
HC-315	male	67	24.9483	Inactivated vaccine	1	positive	6.55129	44.145	negtive	14.3	15.3	34.6	35.8
HC-316	female	64	23.7332	Inactivated vaccine	2	positive	22.6979	244.215	positive	29	22.5	19.4	29.1
HC-317	male	63	21.8845	Inactivated vaccine	2	positive	5.16136	77.355	positive	18.2	25.9	22.9	33
HC-318	male	60	22.6474	recombinant vaccine	1	positive	326.742	1782.4	positive	18.6	23.4	23.6	34.4
HC-319	male	38	21.9671	Inactivated vaccine	2	positive	103.4	1415.48	positive	17	17.7	35.7	29.6
HC-320	female	36	20.5688	Inactivated vaccine	3	negtive	2.4248	36.045	negtive	23.3	29.8	22.2	24.7
HC-321	male	44	27.8132	recombinant vaccine	1	positive	164.453	630.585	positive	17.4	15.7	16.4	50.5
HC-322	female	54	18.2424	recombinant vaccine	1	positive	220.181	1187.46	positive
HC-323	male	38	23.8751	recombinant vaccine	1	positive	317.865	1128.73	positive	12.2	11.5	25.5	50.9
HC-324	female	41	21.6803	recombinant vaccine	1	positive	496.651	2442.15	positive	23.2	14.9	20.5	41.4
HC-325	female	37	21.6413	recombinant vaccine	1	positive	119.075	346.275	positive	52.6	24.1	6.92	16.4
HC-326	male	49	31.7244	recombinant vaccine	1	positive	805.38	3594.78	positive	11.6	8.58	36.5	43.3
HC-327	female	61	26.2611	Inactivated vaccine	1	positive	90.4104	290.385	positive	6.08	6.52	29.1	58.3
HC-328	male	65	24.2215	recombinant vaccine	1	positive	160.73	935.955	positive	42.5	37.5	9.51	10.5
HC-329	female	58	20.3244	recombinant vaccine	1	positive	909.3	4390.2	positive
HC-330	female	65	25.9695	Inactivated vaccine	2	positive	20.299	78.57	positive	30	14.9	12	43.1
HC-331	male	60	22.8571	Inactivated vaccine	3	negtive	2.44645	42.93	negtive	21.3	32.9	15.1	30.7
HC-332	female	29	21.8522	Inactivated vaccine	2	positive	147.653	439.83	positive	24.4	16.1	19.9	39.6
HC-333	female	33	19.052	Inactivated vaccine	3	positive	38.931	218.7	positive	36	21.4	10.4	32.2
HC-334	female	50	23.4236	recombinant vaccine	2	positive	32.8171	221.94	positive	12.9	9.69	37.3	40.1
HC-335	female	55	25.0481	Inactivated vaccine	2	positive	27.0538	118.26	positive	15.3	16.1	34.5	34.1
HC-336	female	25	20.5499	Inactivated vaccine	1	positive	69.7563	252.315	positive	18.9	10.3	13.6	57.2
HC-337	female	63	25.4123	Inactivated vaccine	1
HC-338	male	42	22.0408	recombinant vaccine	1	positive	51.8734	177.39	positive	26.1	23.9	24.5	25.5
HC-339	male	69	27.852	Inactivated vaccine	1	positive	5.06177	63.585	positive	17.4	15	22.6	45
HC-340	male	27	25.7117	recombinant vaccine	1	positive	187.706	547.155	positive
HC-341	female	52	22.1676	Inactivated vaccine	1	positive	173.633	568.62	positive
HC-342	female	30	20.0796	recombinant vaccine	1	positive	1153.94	8748	positive
HC-343	male	66	25.3928	Inactivated vaccine	2	positive	31.6523	218.7	positive	23.5	21.4	26.1	29.1
HC-344	male	57	24.677	recombinant vaccine	2	positive	176.058	748.845	positive	24.7	20.7	20.9	33.8
HC-345	female	65	21.3333	recombinant vaccine	1	positive	188.745	739.53	positive
HC-346	male	66	24.623	recombinant vaccine	1	positive	13.0679	136.485	positive
HC-347	male	66	21.5045	recombinant vaccine	1	positive	405.201	844.02	positive
HC-348	female	63	21.2279	Inactivated vaccine	1	negtive	2.56336	52.245	negtive
HC-349	female	60	21.7555	recombinant vaccine	1	positive	55.1642	247.455	positive
HC-350	male	67	28.4005	recombinant vaccine	1	positive	114.312	368.955	positive
HC-351	female	51	21.0938	recombinant vaccine	2	positive	19.1689	137.295	positive
HC-352	female	67	25.2707	Inactivated vaccine	3	positive	9.526	93.15	positive
HC-353	male	66	20.7054	Inactivated vaccine	1	positive	7.0146	39.285	negtive
HC-354	male	60	20.5175	recombinant vaccine	1	positive	237.371	671.085	positive
HC-355	female	75	22.9592	Inactivated vaccine	1	positive	126.782	467.775	positive
HC-356	female	31	21.2306	recombinant vaccine	2	positive	1051.76	5402.7	positive
HC-357	female	82	26.0375	recombinant vaccine	2	positive	299.636	1230.8	positive
HC-358	female	30	22.3438	Inactivated vaccine	1	positive	135.183	802.305	positive
HC-359	female	34	21.0938	Inactivated vaccine	1	positive	63.4778	200.88	positive
HC-360	male	63	22.2816	Inactivated vaccine	2	positive	21.1997	170.505	positive
HC-361	female	64	25.8481	Inactivated vaccine	1	positive	23.5379	138.915	positive	9.54	11	27.4	52
HC-362	male	31	23.6259	Inactivated vaccine	1	positive	7.56451	89.1	positive	20.9	29.4	29.7	20
HC-363	male	37	23.3564	Inactivated vaccine	1	positive	57.9354	192.375	positive	25.5	30.4	14.2	29.9
HC-364	male	28	24.2722	recombinant vaccine	1	positive	484.094	2491.15	positive	33.6	27.5	12.9	26.1
HC-365	female	64	22.4606	Inactivated vaccine	1	positive	128.125	664.605	positive	25.8	22	23.5	28.7
HC-366	male	62	23.7954	Inactivated vaccine	1	positive	40.5201	191.565	positive	17.8	10.7	14.9	56.6
HC-367	male	31	23.7567	Inactivated vaccine	1	positive	17.7054	82.62	positive	34.4	20.1	17.9	27.5
HC-368	male	68	25.6904	recombinant vaccine	2	negtive	3.47266	46.17	negtive	21.4	25.7	23.2	29.6
HC-369	male	43	26.0021	recombinant vaccine	2	positive	181.773	681.21	positive	22.5	19.4	17.1	41
HC-370	male	53	26.6112	recombinant vaccine	2	positive	106.345	439.83	positive	23.6	23.6	13.8	39
HC-371	female	34	21.7738	recombinant vaccine	2	positive	714.883	2303.64	positive	43.2	20.1	10.4	26.3
HC-372	male	73	28.4304	Inactivated vaccine	1	positive	21.637	173.745	positive	29.1	26.7	21.2	23
HC-373	female	66	22.2039	Inactivated vaccine	1	positive	53.3023	158.76	positive	18.2	12.2	24	45.6
HC-374	female	70	29.2421	Inactivated vaccine	1	positive	21.2603	83.835	positive	30	17.8	26.8	25.3
HC-375	female	67	23.892	Inactivated vaccine	1	positive	4.50753	43.335	negtive	27.4	15.7	16.7	40.2
HC-376	male	30	21.2245	Inactivated vaccine	1	positive	43.0099	214.245	positive	22.4	9.99	15.5	52.2
HC-377	male	67	24.5268	recombinant vaccine	2	positive	8.58639	91.935	positive	16.2	23.5	25.8	34.6
HC-378	male	68	27.8104	Inactivated vaccine	2	negtive	3.5506	38.88	negtive	20.1	17.1	20.1	42.6
HC-379	female	62	23.8319	Inactivated vaccine	2	positive	13.3018	55.89	negtive	13.6	6.98	20.6	58.8
HC-380	female	69	23.0412	recombinant vaccine	2	positive	197.535	562.14	positive	21.5	23.4	22.7	32.3
HC-381	female	62	24.9124	Inactivated vaccine	3	positive	12.6523	100.44	positive	25.3	12.4	31.6	30.7
HC-382	female	56	20.4294	recombinant vaccine	2	positive	205.285	1083.78	positive	24.6	24.9	13.5	37
HC-383	male	38	28.5859	recombinant vaccine	2	positive	12.3145	88.29	positive	12.5	6.18	24	57.3
HC-384	male	63	21.9083	Inactivated vaccine	1	positive	18.9611	147.015	positive	20.9	17	19.5	42.6
HC-385	female	27	20.3125	Inactivated vaccine	1	positive	12.8731	107.73	positive	43.8	34.2	9.59	12.3
HC-386	female	75	25.6615	Inactivated vaccine	1	positive	29.942	105.3	positive	5.44	7.93	31.1	55.6
HC-387	female	64	22.5429	recombinant vaccine	2	positive	88.3753	462.915	positive	33.7	35.9	13.7	16.6
HC-388	male	62	23.8384	recombinant vaccine	2	positive	124.444	437.4	positive	32.4	28.1	12.1	27.3
HC-389	female	61	26.6389	Inactivated vaccine	1	positive	77.3771	225.585	positive	11.9	11.3	26.4	50.4
HC-390	female	61	24.2813	Inactivated vaccine	1	positive	39.3207	216.27	positive	16	7.33	24.7	52
HC-391	female	48	19.9293	Inactivated vaccine	1	negtive	0.433	206.145	positive	26.1	14.1	16.3	43.4
HC-392	female	60	26.1742	recombinant vaccine	3	positive	120.114	405.81	positive	19.2	13.7	12.9	54.2
HC-393	female	66	21.7337	recombinant vaccine	2	positive	84.9979	263.655	positive	33.3	17.8	14.2	34.8
HC-394	female	60	22.231	Inactivated vaccine	2	positive	4.85826	56.7	negtive	24.6	15.9	18.1	41.4
HC-395	male	60	20.5855	Inactivated vaccine	2	negtive	2.48542	34.83	negtive	24.6	12.5	22.4	40.5
HC-396	male	57	22.6242	recombinant vaccine	2	positive	155.36	709.56	positive	35	38.3	16.9	9.8
HC-397	male	76	23.255	Inactivated vaccine	2	positive	9.15362	95.58	positive	20.9	9.27	16.4	53.5
HC-398	male	74	25.203	Inactivated vaccine	1	positive	15.103	112.995	positive	23.5	21.3	18.3	37
HC-399	female	68	21.9428	Inactivated vaccine	1	positive	26.8547	187.11	positive	11.6	14.9	32.1	41.4
HC-400	female	60	26.0479	Inactivated vaccine	1	positive	105.868	306.99	positive	25.8	17.8	20.3	36.1
HC-401	female	68	24.3549	Inactivated vaccine	1	positive	27.699	159.975	positive	21.6	15.5	19.1	43.7
HC-402	male	60	25.4748	Inactivated vaccine	1	positive	10.4916	42.93	negtive	24.3	33.2	23.8	18.8
HC-403	male	83	22.0018	Inactivated vaccine	2	negtive	3.78442	44.55	negtive	24.8	22.6	22	30.6
HC-404	male	66	22.2767	Inactivated vaccine	2	negtive	1.33797	35.64	negtive	21.2	37.4	15.5	25.9
HC-405	female	65	21.9261	Inactivated vaccine	2	positive	45.1186	161.595	positive	27.1	21.8	19.4	31.6
HC-406	male	69	24.2507	Inactivated vaccine	2	positive	20.0046	128.385	positive	14.8	12.6	23.8	48.9
HC-407	female	65	27.2125	recombinant vaccine	3	positive	5.33456	69.255	positive	14.8	14.4	23.3	47.5
HC-408	female	65	20.6894	Inactivated vaccine	3	positive	38.3595	205.335	positive	20.6	15.7	22.7	41
HC-409	female	66	24.0344	Inactivated vaccine	3	positive	9.18393	85.455	positive	16.4	19.4	28.1	36.1
HC-410	male	69	22.546	Inactivated vaccine	3	positive	5.59436	65.61	positive	8.45	8.32	26.3	56.9
HC-411	female	54	16.6493	Inactivated vaccine	1	positive	77.1606	218.7	positive	18	19.9	26.4	35.7
HC-412	male	66	28.0006	Inactivated vaccine	1	positive	36.7314	172.935	positive	22	31.4	15.5	31.1
HC-413	male	69	23.9766	Inactivated vaccine	1	positive	29.4137	163.62	positive	23.2	21.1	15.5	40.2
HC-414	male	70	21.5815	Inactivated vaccine	1	positive	12.0547	34.83	negtive	14.2	15.8	16.8	53.2
HC-415	male	81	26.1097	Inactivated vaccine	2	positive	4.55949	47.385	negtive
HC-416	female	64	25.7224	Inactivated vaccine	2	positive	5.08775	68.04	positive
HC-417	male	65	31.7657	Inactivated vaccine	3	negtive	3.31245	40.5	negtive
HC-418	male	60	24.7246	recombinant vaccine	3	positive	140.465	605.07	positive
HC-419	male	67	27.4066	Inactivated vaccine	3	positive	9.56064	90.72	positive
HC-420	female	25	28.6813	Inactivated vaccine	1	positive	69.8429	302.535	positive

## Sheet: Follow-up data
Number	Monthes	RBD positive or negative	RBD（BAU/mL）	Nabs positive or negative	Nabs（IU/mL）
11045	1	positive	148.68	negtive	18.63
11056	1	positive	8.608	negtive	47.79
11012	1	positive	7.004	negtive	51.03
11057	1	positive	23.636	negtive	53.055
11044	1	negtive	1.176	negtive	55.485
11063	1	positive	11.328	positive	90.72
11071	1	positive	16.7	positive	97.605
11062	1	positive	12.888	positive	106.11
11064	1	positive	20.212	positive	120.69
11068	1	positive	15.476	positive	140.535
11060	1	positive	22.076	positive	161.595
11017	1	positive	27.644	positive	179.01
11065	1	positive	57.32	positive	179.01
11066	1	positive	46.24	positive	204.525
11023	1	positive	23.612	positive	210.195
11009	1	positive	46.2	positive	226.395
11022	1	positive	104.64	positive	331.695
11013	1	positive	82.32	positive	414.315
11038	1	positive	73.52	positive	506.25
11006	1	positive	243.52	positive	742.365
11005	1	positive	502.4	positive	1058.67
11011	1	positive	503.2	positive	1685.2
11005	3	positive	278.332	positive	896.265
11006	3	positive	101.495	positive	243
11009	3	positive	9.08001	negtive	87.48
11011	3	positive	298.64	positive	770.715
11012	3	negtive	3.65019	negtive	12.15
11013	3	positive	33.735	positive	159.165
11017	3	positive	19.7145	positive	159.975
11022	3	positive	32.1589	positive	148.635
11023	3	negtive	2.84914	negtive	68.445
11038	3	positive	10.1279	negtive	108.945
11044	3	negtive	0.433	negtive	45.36
11045	3	positive	103.444	negtive	34.425
11056	3	negtive	0.4763	negtive	46.98
11057	3	positive	28.8508	negtive	45.765
11060	3	negtive	1.46354	negtive	64.8
11062	3	negtive	1.14745	negtive	57.105
11063	3	negtive	1.4289	negtive	50.22
11064	3	negtive	2.01345	negtive	60.345
11065	3	positive	23.9016	negtive	105.705
11066	3	positive	21.282	positive	134.055
11068	3	positive	6.97563	negtive	80.595
11071	3	positive	8.80722	negtive	55.485
11005	6	positive	117.689	positive	509.085
11006	6	positive	69.713	positive	174.96
11009	6	positive	5.39951	negtive	52.65
11011	6	positive	94.2208	positive	387.18
11012	6	positive	4.83228	negtive	25.92
11013	6	positive	16.8437	positive	155.115
11023	6	negtive	3.81473	negtive	51.03
11038	6	positive	6.01437	negtive	54.675
11044	6	negtive	0.433	negtive	16.2
11045	6	positive	85.7773	negtive	63.18
11056	6	negtive	1.43323	negtive	19.44
11057	6	positive	29.5003	negtive	28.755
11060	6	negtive	0.84435	negtive	34.425
11062	6	negtive	1.05219	negtive	18.225
11063	6	negtive	1.77963	negtive	17.415
11064	6	negtive	2.00046	negtive	29.97
11065	6	positive	6.61624	negtive	44.145
11066	6	positive	4.8496	negtive	42.93
11068	6	positive	9.38744	negtive	90.315
11071	6	positive	12.6436	negtive	82.62
