# Supplementary figures and images for: Cellular and Humoral Responses to Recombinant and Inactivated SARS-CoV-2 Vaccines in CKD Patients: An Observational Study
Source: MDPI journal article supplement (doi:10.3390/jcm12031225), 2023-02-03

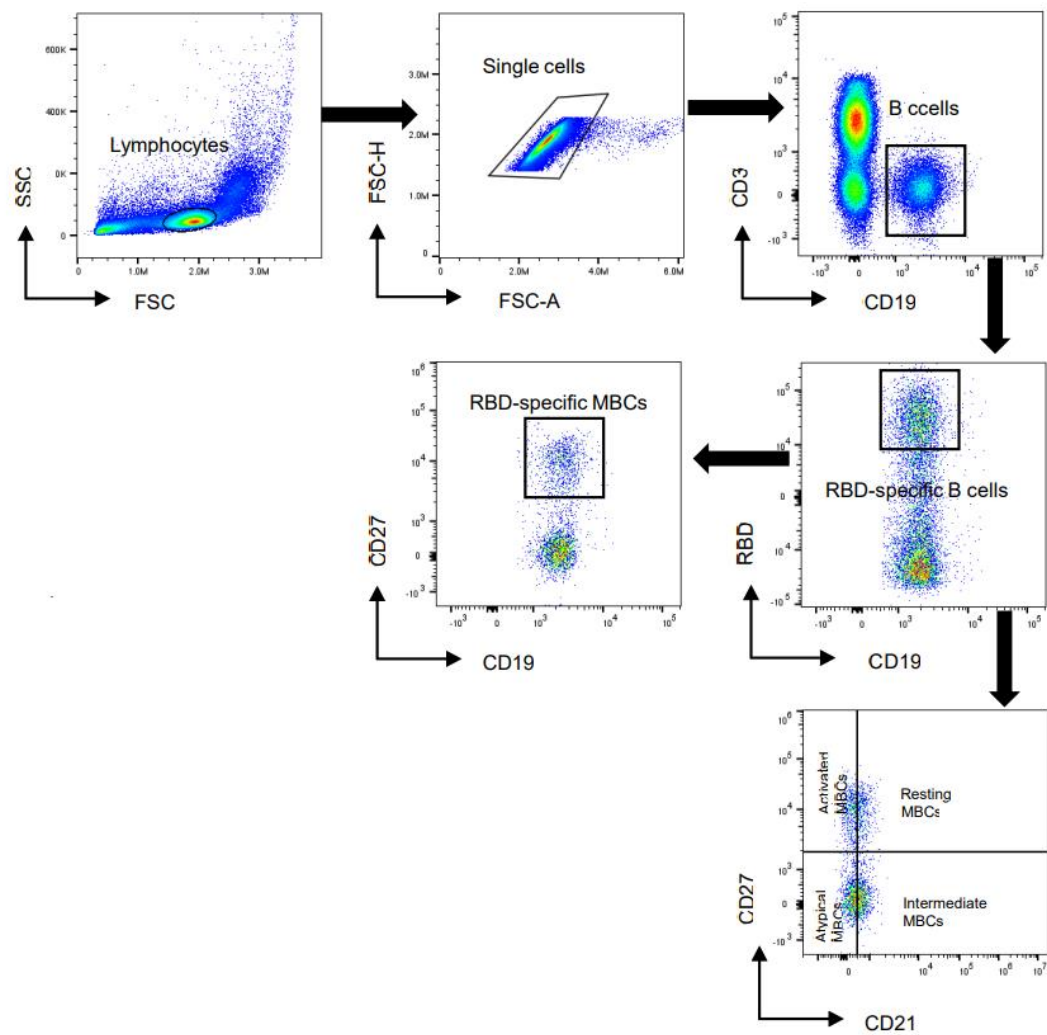

The full gating strategy of flow cytometry for target cell populations.

Supplement: s1 [file s1]
